# Supplementary material for: Preclinical In Vivo Modeling of Pediatric Sarcoma—Promises and Limitations
Source: MDPI journal article supplement (doi:10.3390/jcm10081578), 2021-04-08
Supplement: s1 [file s1]

| Sarcoma entity                                                          | 1.Genetic mutation                                            | 2. Promotor                                                                            | 3. Genetic strategy                                                                                                                                                                                                                                | 4. Mode of activation                                                                                                      | 5. 2 <sup>nd</sup> hit                                                                                       | 6.Tumor develop? Histology?                                                                                                                                                  | 7. Mouse strain                              | 8. Penetrance (%) / Latency (Days/weeks)                                                                                                                                                                                                | 9. Model details / Significance                                                                                                                                                                                                                                                                | 10. Reference                                                                                                      |
|-------------------------------------------------------------------------|---------------------------------------------------------------|----------------------------------------------------------------------------------------|----------------------------------------------------------------------------------------------------------------------------------------------------------------------------------------------------------------------------------------------------|----------------------------------------------------------------------------------------------------------------------------|--------------------------------------------------------------------------------------------------------------|------------------------------------------------------------------------------------------------------------------------------------------------------------------------------|----------------------------------------------|-----------------------------------------------------------------------------------------------------------------------------------------------------------------------------------------------------------------------------------------|------------------------------------------------------------------------------------------------------------------------------------------------------------------------------------------------------------------------------------------------------------------------------------------------|--------------------------------------------------------------------------------------------------------------------|
| 1. UPS/ Undifferentiated pleomorphic sarcoma                            | <b>Gli2A (constitutively active)</b>                          | CAG, PCP2–Cre                                                                          | Cag–LSL–Gli2A(Germ line transmission)                                                                                                                                                                                                              | Pairing with PCP2–Cre                                                                                                      | Pairing with SmoM2 embryonically lethal                                                                      | Yes, small round cell (Ewing–like features)                                                                                                                                  | Mixed C57BL/6/129Sv                          | 98%/ 8 weeks                                                                                                                                                                                                                            | Gli–2induces UPS with Ewing–like–featuresby expression of EWS–ETS target genes, including Nkx2.2.                                                                                                                                                                                              | Fleming et al, Molecular Cancer Research, 2019                                                                     |
|                                                                         | <b>KRAS<sup>G12D</sup></b>                                    | Rosa–26                                                                                | R26 <sup>CreER</sup> ; p53 <sup>lox+</sup> ; K <sup>fl</sup> ERT                                                                                                                                                                                   | <i>P53</i> inactivation by systemic Tamoxifen (i.p.), local <i>Kras</i> activation by i.m. injection of Adeno–RfO (Flpase) | <i>P53</i> inactivation, <i>Cardiotoxin</i> injection i.m.                                                   | Yes, UPS                                                                                                                                                                     | Mixed C57BL/6/129Sv                          | <i>100%/6weeks (simultaneous P53 deletion and KRAS activation);8%/11 weeks (KRAS expression,3 weeks later P53 deletion);50%/6weeks (KRAS expression,3 weeks later P53 deletion,CTX treatment at day 10)</i>                             | <i>Muscle injurycooperates with P53 inactivation for sarcomagenesis. P53<sup>+/+</sup> plus muscle–injury–mediated UPS show chromosomal amplifications including YAP1/ MET.</i>                                                                                                                | Van Mater et al, J CI Insight, 2018                                                                                |
|                                                                         | <b>KRAS<sup>G12D</sup></b>                                    | Rosa–26                                                                                | KRAS <sup>G12D</sup> ;LoxP–/+; ROSA26 <sup>Cre</sup> ;Ca <sup>fl</sup> CreP– mice                                                                                                                                                                  | I.m. injection of Adeno–Cre or in situ electroporation (EPO) of Prx3.0–P–Cre plasmid                                       | <i>P53</i> inactivation via <i>CRISPR</i>                                                                    | Yes, UPS (15% myogenic, 85% non–myogenic)                                                                                                                                    | Mixed C57BL/6/129Sv                          | Ad–P–Cre:100%/10 weeks; EPO with Cas9 plasmid: 80%/11 weeks; EPOwith endogenous Cas9: 100%/7weeks                                                                                                                                       | In vivo electroporation can be as effective as lentiviral delivery for conditional tumor induction.                                                                                                                                                                                            | Huang et al, Nature Communications, 2017                                                                           |
|                                                                         | P53 inactivation or hotspot mutation                          | –                                                                                      | –                                                                                                                                                                                                                                                  | Local injection of Ad5–CMVE–Cre (Adenovirus) i.m. or s.c.                                                                  | –                                                                                                            | Yes, 93% UPS; 7% pleomorphic RMS                                                                                                                                             | C57BL/6                                      | 100%/10weeks                                                                                                                                                                                                                            | First Pten–inactivatedUPS model.                                                                                                                                                                                                                                                               | Buchakjian et al, PlosOne, 2017                                                                                    |
|                                                                         | <b>P53 and Pten inactivation</b>                              | SFFV                                                                                   | <i>HindIII</i> skeletal myoblasts isolated from <i>P53<sup>flx/flx</sup></i> ; 10 pups;intravially transduced into very young <i>KRAS<sup>G12D</sup></i> ; transplanted into hindlimb of P53 <sup>+/+</sup> mice                                   | Constitutive expression                                                                                                    | <i>P53<sup>+/–</sup></i>                                                                                     | Yes, High grade sarcoma with myofibroblastic differentiation                                                                                                                 | C57BL/6                                      | 85%/ 5 weeks                                                                                                                                                                                                                            | <i>Mutant KRAS and P53 inactivation cooperate in myoblasts for sarcomagenesis.</i>                                                                                                                                                                                                             | McKinnon et al, Oncotarget, 2015                                                                                   |
|                                                                         | <b>KRAS<sup>G12D</sup></b>                                    | Rosa–26                                                                                | <i>Pairing of LSL–KRAS<sup>G12D</sup>–P53<sup>+/–</sup>–mice with 2 different Tamoxifen–inducible Cre lines: Pax7–CreER;Quiescent &amp; activated satellite (dihydropyridase) &amp; MyoD–CreER;satellite MyoD+satellite cells and progenitors)</i> | Systemic tamoxifen administration                                                                                          | <i>P53<sup>+/–</sup>; Cardiotoxin injection i.m.</i>                                                         | <i>Yes,spectrum of myogenic andnon myogenicsarcoma: Myf7–CreER:65%/94% eRMS;nest: Balb:1–6% myogenic;26% non–myogenic;MyoD–CreER:100%UPS (60% myogenic,40% non–myogenic)</i> | Mixed C57BL/6/129Sv                          | Myf7–CreER: 100%/ 6 weeks, MyoD–CreER: 100% /21 weeks                                                                                                                                                                                   | RMS and UPS have distinct and overlappingcells of origin within the muscle lineage. Pax7+MyoD+ quiescent satellite cells can be a cell of origin for RMS, Pax7+MyoD+cells of origin for UPS.                                                                                                   | Blum et al, Cell Reports, 2013                                                                                     |
|                                                                         | <b>KRAS<sup>G12V</sup></b>                                    | Cyp1A1                                                                                 | Systemic overexpression/loss(germ line)                                                                                                                                                                                                            | Crossing with Ah–Cre mice (skeletal muscle) for systemic activation                                                        | <i>P53<sup>+/–</sup>R172H; P53<sup>flx/flx</sup>R172; P53<sup>flx/flx</sup>+/+; P53<sup>flx/flx</sup>+/+</i> | Yes, UPS                                                                                                                                                                     | Mixed C57BL/6/129Sv                          | <i>P53<sup>+/–</sup>R172H: 88%/10 weeks;P53<sup>flx/flx</sup>R172: 100%/7 weeks; P53<sup>flx/flx</sup>+/+: 94%/7 weeks; P53<sup>flx/flx</sup>+/+: 7%/15 weeks;</i>                                                                      | <i>Mutant P53 (P53<sup>R172H</sup>) is an even more potent activator of tumorigenesis in Ras–drivenUPS than loss of P53. Low rate spontaneous metastasis (13%) was only observed in mutant P53, but not loss of P53 group.</i>                                                                 | Doyle et al, J urnal of Pathology, 2010                                                                            |
|                                                                         | <b>KRAS<sup>G12D</sup></b>                                    | Rosa–26                                                                                | Conditional KRAS <sup>G12D</sup> overexpression                                                                                                                                                                                                    | Local injection of Ad–Cre (adenovirus) into leg and uterus                                                                 | <i>P53<sup>flx/flx</sup>; Cdkn2a<sup>flx/flx</sup></i>                                                       | Yes, High grade sarcoma with myofibroblastic differentiation                                                                                                                 | C57BL/6                                      | >90%/13 weeks                                                                                                                                                                                                                           | <i>KRAS–drivensarcomagenesis cooperates with Cdkn2a inactivation, but not with inactivation of Bak1 and Bax. Foxm1 expression facilitates UPS metastasis.</i>                                                                                                                                  | Kirsch et al, Nature Medicine, 2007;Mito et al, Plos ONE, 2009;                                                    |
|                                                                         | <b>KRAS<sup>G12D</sup></b>                                    | Ryr2                                                                                   | Conditional KRAS <sup>G12V</sup> overexpression                                                                                                                                                                                                    | Cre vector pCAGetCre delivered via electroporation of the gastrocnemius muscle of 8–10week old mice                        | <i>P53<sup>+/–</sup> &amp; P53<sup>+/–</sup></i>                                                             | Yes, pleomorphic RMS (Myogenin, MyoD expression not tested)                                                                                                                  | Mixed C57BL/10/129Sv                         | 100%/6 weeks (P53 <sup>+/–</sup> ) & 40%/11 weeks (P53 <sup>+/+</sup> )                                                                                                                                                                 | <i>Cooperation of oncogenic RAS and P53 inactivation leads to very efficient pleomorphic sarcoma development.</i>                                                                                                                                                                              | Tsumura et al, Oncogene, 2006                                                                                      |
|                                                                         | <b>P53 inactivation or hotspot mutation</b>                   | –                                                                                      | –                                                                                                                                                                                                                                                  | Embryonic stem cell alteration, crossing of mice                                                                           | –                                                                                                            | Yes, various entities, especially lymphoma and sarcoma (typically UPS, more rarely also OS, RMS and Angiosarcoma)                                                            | Mixed C57BL/6/129Sv                          | 10–50%/variable, typically many months                                                                                                                                                                                                  | <i>First in vivo models for P53 inactivation, including typical mutations for Li–Fraumeni tumor predisposition syndrome.</i>                                                                                                                                                                   | Donehower et al, Nature, 1992; J acks et al, Current Biology, 1994;Liang et al, Cell, 2004;Olwe et al, Cell, 2004; |
| 2. eRMS/ Embryonal/ Fusion–negative rhabdomyo–sarcoma & pleomorphic RMS | <b>Dystrophin (MDX/Mtr mouse)</b>                             | –                                                                                      | Crossing of mice, additionally Barium chloride injection to induce muscle damage and regeneration                                                                                                                                                  | Constitutive (germline)                                                                                                    | <i>P53<sup>+/+</sup> &amp; P53<sup>+/–</sup> background</i>                                                  | Yes, RMS not further specified                                                                                                                                               | C57BL/6                                      | <i>MDX/mTr +P53<sup>+/–</sup>: 100%/17 weeks; MDX/mTr +P53<sup>+/–</sup>: 95%/35 weeks</i>                                                                                                                                              | Duchenne muscular dystrophyseverity facilitates RMS development. Muscle stem cells acquire RMS–like gene signature even before transformation.                                                                                                                                                 | Boscolo Sesillo et al, Cell Reports, 2019                                                                          |
|                                                                         | <b>Mdm2–ALT1(Splice variant 1)</b>                            | CAG (CMV–enhancer beta–actin promoter);S0K2–Cre,also Cdi9 Cre for lymphoma development | Conditional alleles activated by crossing to Cre line                                                                                                                                                                                              | Constitutive (germline)                                                                                                    | <i>P53<sup>+/–</sup> background</i>                                                                          | <i>Yes,eRMS in 50% of Mdm2–ALT1<sup>+/–</sup> and0% Mdm2–ALT1<sup>+/–</sup> Rest lymphoma,osteosarcoma hemangiosarcoma,teratoma</i>                                          | C57BL/6                                      | <i>Mdm2–ALT1<sup>+/–</sup>+P53<sup>+/–</sup>: 100%/20weeks (50% of which are eRMS); Mdm2–ALT1<sup>+/–</sup>+P53<sup>+/–</sup>: 100%/27weeks (most of which are lymphoma)</i>                                                            | <i>Mdm2–ALT1increases P53–loss–mediatedeRMS tumorigenesis</i>                                                                                                                                                                                                                                  | Comiskey et al, Oncogene, 2018                                                                                     |
|                                                                         | <b>hYAP1<sup>S127A</sup></b>                                  | Col1a.Cre lines: Pax7–cre/ERT2, Myf5–Cre, MyoD1–Cre;                                   | <i>Rosa26–Lsl–Col1a–rtTA–TetO–YAP1<sup>S127A</sup> mice paired with different Cre lines</i>                                                                                                                                                        | Constitutive or by systemic Tamoxifen administration                                                                       | <i>Cardiotoxin and Bariumchloride i.m.</i>                                                                   | Yes, eRMS                                                                                                                                                                    | Not reported                                 | 4–8weeks, penetrance not reported                                                                                                                                                                                                       | <i>YAP1 hyperactivity in activated, but not quiescent satellite cells, induces eRMS.</i>                                                                                                                                                                                                       | Tremblay et al, Cancer Cell, 2014; Slemmons et al, PlosOne, 2015;                                                  |
|                                                                         | <b>SmoM2 (Constitutively active)</b>                          | Rosa26,Cre lines: aP2–Cre, MCK–Cre, Myog–Cre, Myf5–Cre;                                | Conditional alleles activated by different Cre lines via mouse crossing                                                                                                                                                                            | Constitutive (germline)                                                                                                    | <i>Cdkn2a inactivation</i>                                                                                   | Yes, eRMS                                                                                                                                                                    | Mixed                                        | 80%/6weeks for adipocyte–specific aP2–Cre; 100%/4 weeks (+Cdkn2a); Close to 100%/17 weeks                                                                                                                                               | SHH activation in adipocyte progenitors can efficiently induce eRMS, particularly in cooperation with loss of Cdkn2a.                                                                                                                                                                          | Hatley et al, Cancer Cell, 2013                                                                                    |
|                                                                         | <b>Her–2/neu</b>                                              | MMTV–LTR                                                                               | Systemic overexpression (apart from mammary gland);Crossing of mice                                                                                                                                                                                | Constitutive (germline)                                                                                                    | <i>P53<sup>+/+</sup></i>                                                                                     | Yes, genitorunary eRMS, only in males                                                                                                                                        | Balb/c                                       | –                                                                                                                                                                                                                                       | <i>Igf2, p19Arf and p21Cip1 are upregulated in preneoplastic tissue.</i>                                                                                                                                                                                                                       | Ianzano et al, Oncotarget, 2013                                                                                    |
|                                                                         | <b>Dystrophin (MDX mouse)</b>                                 | –                                                                                      | Crossing of mice,plus Cardiotoxin (CTX) injection to induce muscle damage and regeneration;                                                                                                                                                        | Constitutive (germline)                                                                                                    | <i>P53<sup>+/–</sup> &amp; P53<sup>+/–</sup> background</i>                                                  | Yes, eRMS                                                                                                                                                                    | Mixed C57BL/10/129Sv                         | <i>Mdx/P53<sup>+/–</sup>: 9%/43 weeks;Mdx/P53<sup>+/–</sup>: 60%/26 weeks; Mdx/P53<sup>+/–</sup>: 90%/17 weeks;Mdx/P53<sup>+/–</sup> plus CTX: 100%/3 weeks;Mdx/P53<sup>+/–</sup> plus CTX: 0%/P53<sup>+/–</sup> alone: 20%/2weeks.</i> | P53 inactivation accelerates eRMS induction in dystrophin–inactivatedmice. Muscle damage and regeneration further increases efficiency.                                                                                                                                                        | Camboni et al, J urnal of Pathology, 2012                                                                          |
|                                                                         | <b>P53, Ptcch and Rb1</b>                                     | Pax7CreER, MCre, Myf5Cre, Myf6Cre;                                                     | Conditional alleles activated by 4 different Cre lines via mouse crossing                                                                                                                                                                          | Constitutive and via Tamoxifen (Pax7CreER)                                                                                 | <i>All tumors P53 inactivated, some also Ptcch–, some also Rb1–inactivated</i>                               | Yes, eRMS but also UPS, OS and others depending on driver and Cre line                                                                                                       | Mixed                                        | Variable, depending on driver and Cre line                                                                                                                                                                                              | eRMS and UPS lie in a continuum(Satellite cells predisposed towards UPS, maturing myoblasts towards eRMS).                                                                                                                                                                                     | Rubin et al, Cancer Cell, 2011                                                                                     |
|                                                                         | <b>Dystrophin (MDX mouse) &amp; Alpha1–Sarcoglycan (Sgca)</b> | EIIA–Cre and Rosa26–CreERT2                                                            | Crossing to hetero– and homo–zygosity of either gene, crossing with mice inactivated for 2nd hits                                                                                                                                                  | Constitutive (germline)                                                                                                    | <i>Galg1, Galgt2, Cmah</i>                                                                                   | Yes, eRMS                                                                                                                                                                    | Mixed C57BL/6 & C57BL/10                     | <i>9% for mutated Dystrophin, 4% for Sgca<sup>+/–</sup> /73 weeks</i>                                                                                                                                                                   | <i>Muscle dystrophy–relatedmutations in Dystrophinand Sgca can both lead to RMS in aged mice. Tumors exhibitMdm2<sup>+/–</sup> &amp; P53 amplification with cancer–associated P53 missense mutations.</i>                                                                                      | Fernandez et al, American J urnal of Pathology, 2010                                                               |
|                                                                         | <b>P53 and Rb1 inactivation</b>                               | –                                                                                      | Microinjection of embryos with SV40–Tumorigen (Tag) to target P53 and RB1                                                                                                                                                                          | Systemic tamoxifen administration embryonically and postnatally                                                            | –                                                                                                            | Yes, cardiac RMS, not further specified, also smooth muscle proliferation in vessels                                                                                         | Mixed Balb/c and others                      | 20% RMS (not specified, probably eRMS–like) & 8% medulloblastoma (21 weeks, but only upon neonatal induction (Ptcch <sup>flx/flx</sup> ))                                                                                               | <i>Perinatally, but not postnatally induced Ptcch heterozygosity resulted in the formation of RMS, accompanied by the silencing of the remaining wild–typePtcch allele. Homozygous Ptcch loss was embryonically lethal, but led to basal cell carcinoma (no RMS) when induced postnatally.</i> | Zibat et al, Cancer Cell, 2009 et al, PlosOne, 2017                                                                |
|                                                                         | <b>Dystrophin (MDX mouse)</b>                                 | –                                                                                      | MDX mouse model of Duchenne muscular dystrophy (spontaneous point mutation in exon 23 of the Dystrophin gene)                                                                                                                                      | Constitutive (germline)                                                                                                    | –                                                                                                            | Yes, late in life aRMS–like (fusion gene presence not analyzed, probably rather eRMS)                                                                                        | C57BL/10                                     | 12 weeks (8 mice in total, penetrance not reported)                                                                                                                                                                                     | Mice of MDX model of Duchenne muscular dystrophy can develop RMS late in life.                                                                                                                                                                                                                 | Köbber et al, J urnal of Thoracic and Cardiovascular Surgery, 2008                                                 |
|                                                                         | <b>Sufu<sup>+/–</sup> (Suppressor of fused)</b>               | –                                                                                      | Systemic Gene trapping                                                                                                                                                                                                                             | Constitutive (germline)                                                                                                    | <i>P53<sup>+/–</sup> background</i>                                                                          | Yes, eRMS, medulloblastoma                                                                                                                                                   | Mixed C57BL/6 & CD1                          | 9% /21 weeks for RMS, 58% medulloblastoma, 15% lymphoma (probably due to P53 loss alone)                                                                                                                                                | <i>Sufu<sup>+/–</sup> is tumorigenic (including eRMS), but only on P53<sup>+/–</sup> background. Sufu<sup>+/–</sup> embryonically lethal. Sufu mutations not as tumorigenic as Ptcch mutations.</i>                                                                                            | Lee et al, Oncogene, 2007                                                                                          |
|                                                                         | <b>SmoM2 (Constitutively active), Ptcch</b>                   | Rosa26 for SmoM2, CAGGs for Cre–ER(systemic)                                           | Systemic expression of SmoM2 (Constitutively active form of SmO)                                                                                                                                                                                   | Systemic tamoxifen administration                                                                                          | <i>Ptcch<sup>+/+</sup> background</i>                                                                        | Yes, eRMS, basal cell carcinoma, medulloblastoma, pancreatic mucinous neoplasia                                                                                              | Mixed 129Sv/Swiss Webster as main components | 100%/5 weeks upon tamoxifen for RMS (100% for basala cell carcinoma, 40% for medulloblastoma and pancreas lesions)                                                                                                                      | Smo–mediatedSonic Hedgehoc signaling can induce multifocal eRMS with high efficiency.                                                                                                                                                                                                          | Mao et al, Cancer Research, 2006                                                                                   |
|                                                                         | <b>Her–2/neu</b>                                              | MMTV–LTR                                                                               | Systemic overexpression (apart from mammary gland); Crossing of mice                                                                                                                                                                               | Constitutive (germline)                                                                                                    | <i>P53<sup>+/–</sup> background</i>                                                                          | Yes, eRMS                                                                                                                                                                    | Balb/c                                       | 100%/14 weeks                                                                                                                                                                                                                           | <i>Her–2/neuinefficiently drives genitorunaryeRMS in male mice on P53<sup>+/–</sup> background, but not in females.</i>                                                                                                                                                                        | Nanni et al, Cancer Research, 2003                                                                                 |
|                                                                         | <b>FOS &amp; P53</b>                                          | –                                                                                      | Systemic inactivation, Crossing of mice                                                                                                                                                                                                            | Constitutive (germline)                                                                                                    | –                                                                                                            | Yes, eRMS                                                                                                                                                                    | Mixed C57BL/6/129Sv                          | 90%/16 weeks for homozygous double knockout, less efficient in heterozygosity                                                                                                                                                           | <i>Fos/PS3 double knockout mice develop eRMS in facial and orbital regions.</i>                                                                                                                                                                                                                | Fleischmann et al, Cancer Cell, 2003                                                                               |
|                                                                         | <b>HGF/HF</b>                                                 | MT–1                                                                                   | Systemic overexpression, Crossing of mice                                                                                                                                                                                                          | Constitutive (germline)                                                                                                    | <i>Ink4a/Arfinactivation</i>                                                                                 | Yes, eRMS                                                                                                                                                                    | Mixed C57BL/6                                | Mixed FVB/C57BL/6                                                                                                                                                                                                                       | <i>Ink4a/Arfinactivation increases efficiency of c–Met–tumorigenicity.</i>                                                                                                                                                                                                                     | Sharp et al, Nature Medicine, 2002                                                                                 |
|                                                                         | <b>Ptcch (Patch)</b>                                          | –                                                                                      | Systemic inactivation (exons 6 & 7), Crossing of mice                                                                                                                                                                                              | Constitutive (germline)                                                                                                    | –                                                                                                            | Yes, eRMS                                                                                                                                                                    | Mixed C57BL/6 & CD1                          | 9% in CD1, 2% in C57BL/6/latency na                                                                                                                                                                                                     | <i>Germine GEMM of Gorlin syndrome with typical features and eRMS (with Gli1 and Igf2 overexpression). Ptcch– embryonically lethal.</i>                                                                                                                                                        | Hahn et al, Nature Medicine, 1998                                                                                  |
|                                                                         | <b>HGF/HF</b>                                                 | MT–1                                                                                   | Systemic overexpression, Crossing of mice                                                                                                                                                                                                          | Constitutive (germline)                                                                                                    | –                                                                                                            | Yes, RMS not further specified, amelanotic melanoma, hepatic and mammary tumors                                                                                              | Mixed FVB/N                                  | 7% RMS/latency na                                                                                                                                                                                                                       | <i>Activation of c–Met–tyrosinekinase via autocrine signaling is tumorigenic.</i>                                                                                                                                                                                                              | Takayama et al, PNAS, 1997                                                                                         |
| 3. aRMS/ Alveolar/ Fusion–positive rhabdomyo–sarcoma                    | <b>Pax3–Foxo1</b>                                             | Endogenous Pax3 locus; Cre line: Myf6Cre                                               | Conditional alleles, targeted via Cre                                                                                                                                                                                                              | Crossing of conditional mice with Cre lines                                                                                | <i>Inactivation of Cdkn2a, Pax3 &amp; Sjk 3d4</i>                                                            | Yes, aRMS                                                                                                                                                                    | Mixed C57BL/6/129Sv                          | <i>Stk3d4<sup>+/–</sup>: 88%/16 weeks; Stk3d4<sup>+/–</sup>: 27%/26 weeks;</i>                                                                                                                                                          | <i>Activated Hippo signaling increases tumorigenesis in Cdkn2a–inactivatedaRMS.</i>                                                                                                                                                                                                            | Oristian et al, Cancer Research, 2018                                                                              |
|                                                                         | <b>Pax3–Foxo1</b>                                             | Endogenous Pax3 locus; Cre lines: Pax7CreER, Myf5CreER, Myf6CreER, MCre;               | <i>Overexpression via Cre–LoxP–conditional Pax3–Foxo1 knockin allele</i>                                                                                                                                                                           | Systemic Tamoxifen administration at P30                                                                                   | <i>P53, Pax3 inactivation</i>                                                                                | Yes, aRMS (Pax7CreER tumors showed spindle/pleomorphic morphology)                                                                                                           | Mixed C57BL/6/129Sv                          | <i>MCre: 40%/29 weeks; Myf6CreER: 100%/15 weeks; Pax7CreER: 65%/48 weeks; Myf6CreER: Embryonically lethal except for one (tumor–bearing) mouse;</i>                                                                                     | aRMS can arise from different muscle lineages, particularly efficient in maturing myoblasts.                                                                                                                                                                                                   | Abraham et al, Genes and Development, 2014                                                                         |
|                                                                         | <b>Pax3–Foxo1</b>                                             | Endogenous Pax3 locus; Cre lines: Myf6 (differentiating myogenic cells);               | <i>Systemic overexpression via Cre–LoxP–conditional Pax3–Foxo1 knockin allele (partly plus conditional Foxo1–knockout allele)</i>                                                                                                                  | Crossing of conditional mice with Cre lines                                                                                | <i>Ink4a/Arfor P53 inactivation</i>                                                                          | Yes, aRMS                                                                                                                                                                    | Mixed C57BL/6/129Sv                          |                                                                                                                                                                                                                                         |                                                                                                                                                                                                                                                                                                |                                                                                                                    |
